# Supplementary material for: TA–Fe(iii) complex coated PS nanospheres for non-iridescent structural coloration of cotton fabric
Source: Royal Society of Chemistry journal article supplement (doi:10.1039/d2tc03849h), 2022-01-01
Supplement: d2tc03849h1.pdf [file d2tc03849h1.pdf]

**TA-Fe(III) complex coated PS nanospheres for non-iridescent structural  
coloration of cotton fabric**

Xiaowei Zhu<sup>a</sup>, Yijiang Li<sup>a</sup>, Tianchen Wei<sup>a</sup>, Yichen Li<sup>a\*</sup>, Tieling Xing<sup>a\*</sup>, Matthew D.

Shawkey<sup>b</sup>, Guoqiang Chen<sup>a</sup>

a. College of Textile and Clothing Engineering, Jiangsu Engineering Research Center of Textile Dyeing and Printing for Energy Conservation, Discharge Reduction and Cleaner Production (ERC), Soochow University, Suzhou 215123, China;

b. Department of Biology, Evolution and Optics of Nanostructures Group, University of Ghent, Ghent 9000, Belgium

\*Corresponding authors: [ycli131@suda.edu.cn](mailto:ycli131@suda.edu.cn), ORCID: 0000-0001-8799-8843;  
[xingtieling@suda.edu.cn](mailto:xingtieling@suda.edu.cn), Tel.: +86-512-6706-1175, ORCID: 0000-0002-4136-3137

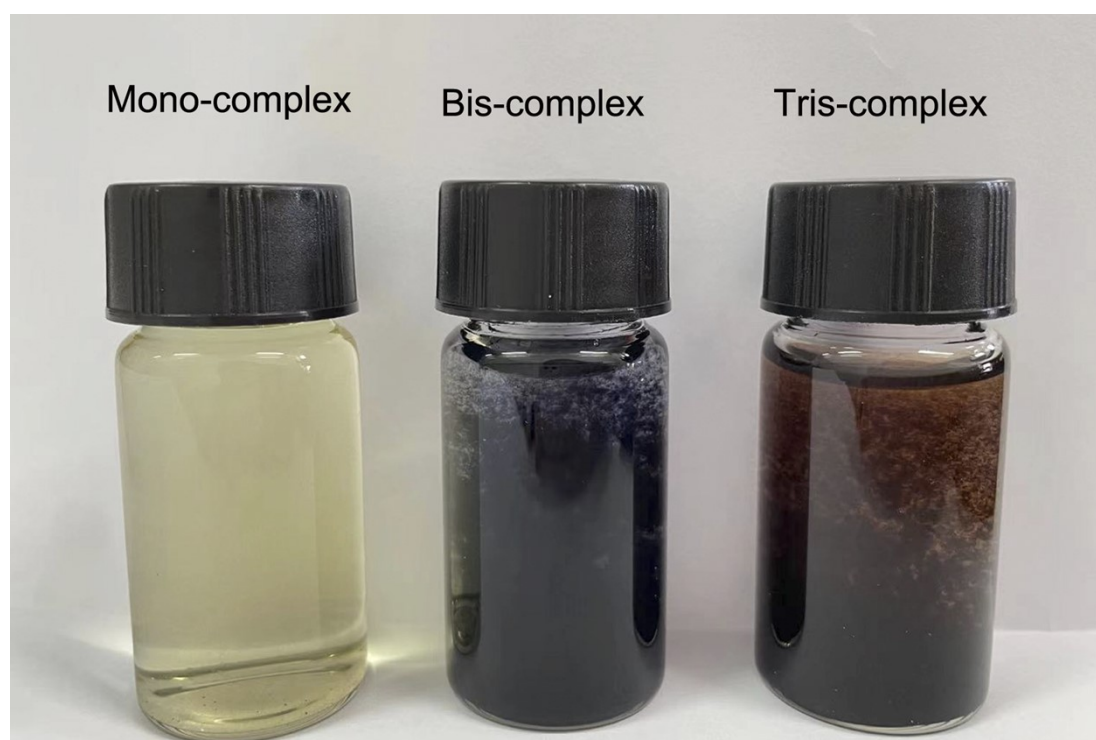

**Fig. S1** The digital image of TA-Fe(III) coordination complex dispersion

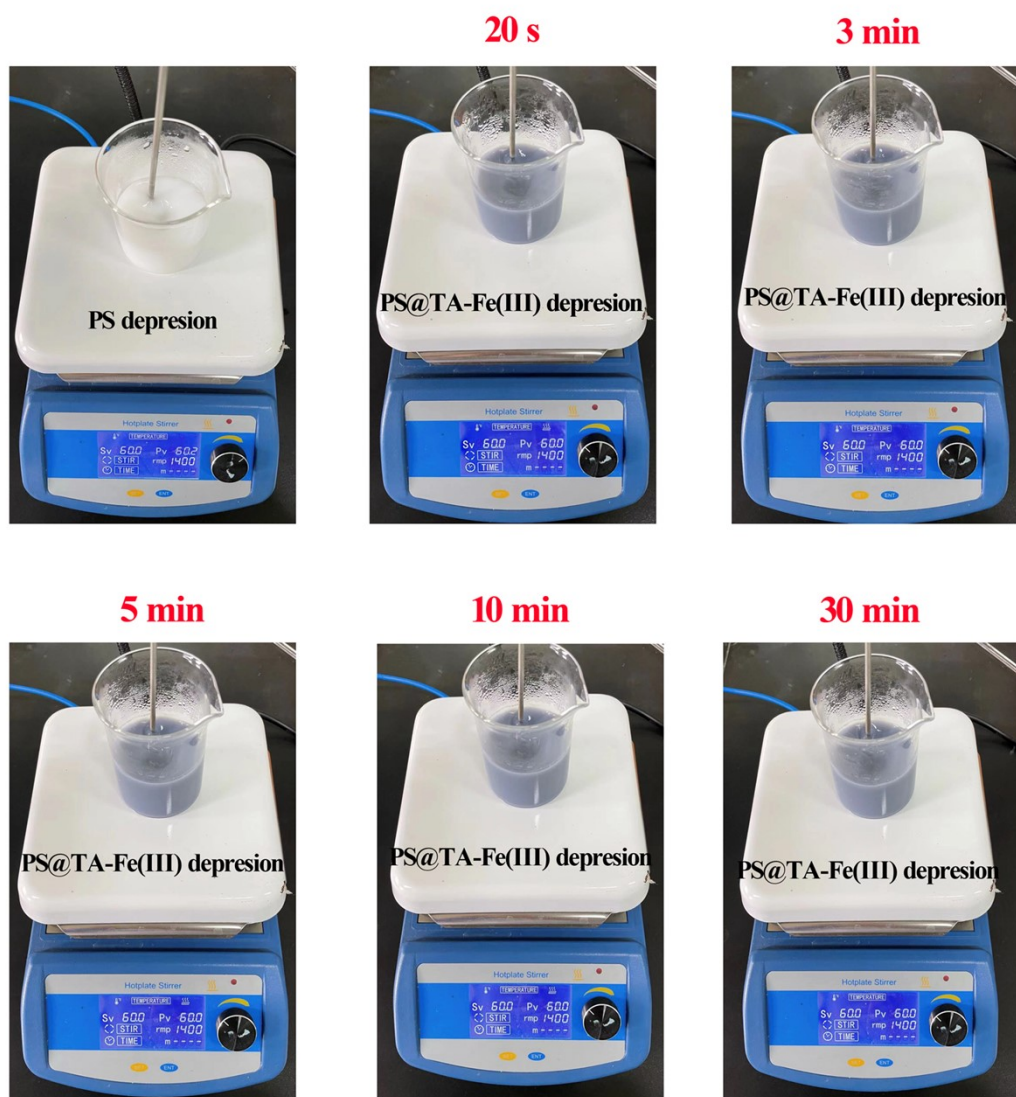

**Fig. S2** Sequential digital images depicting TA-Fe(III) shell coated on PS NPs

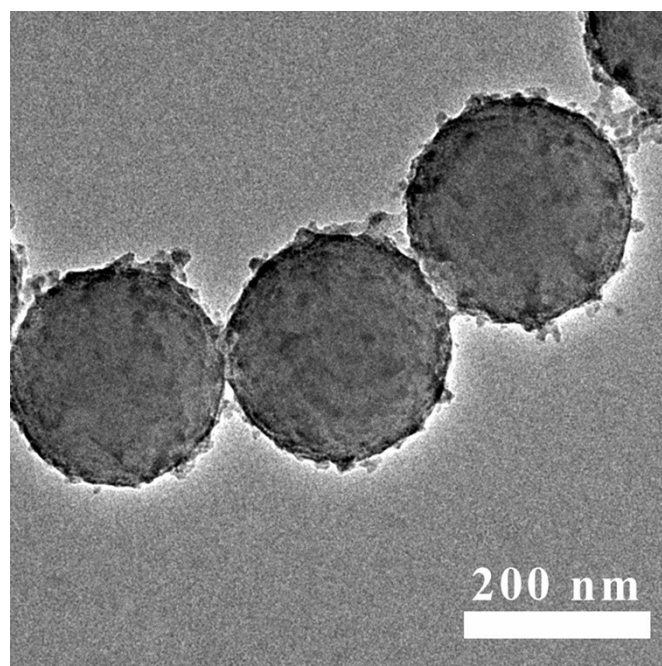

**Fig. S3** TEM images of PS@Fe(III)-TA NPs after 1h ultrasonic treatment (the diameter of PS spheres are 245nm)

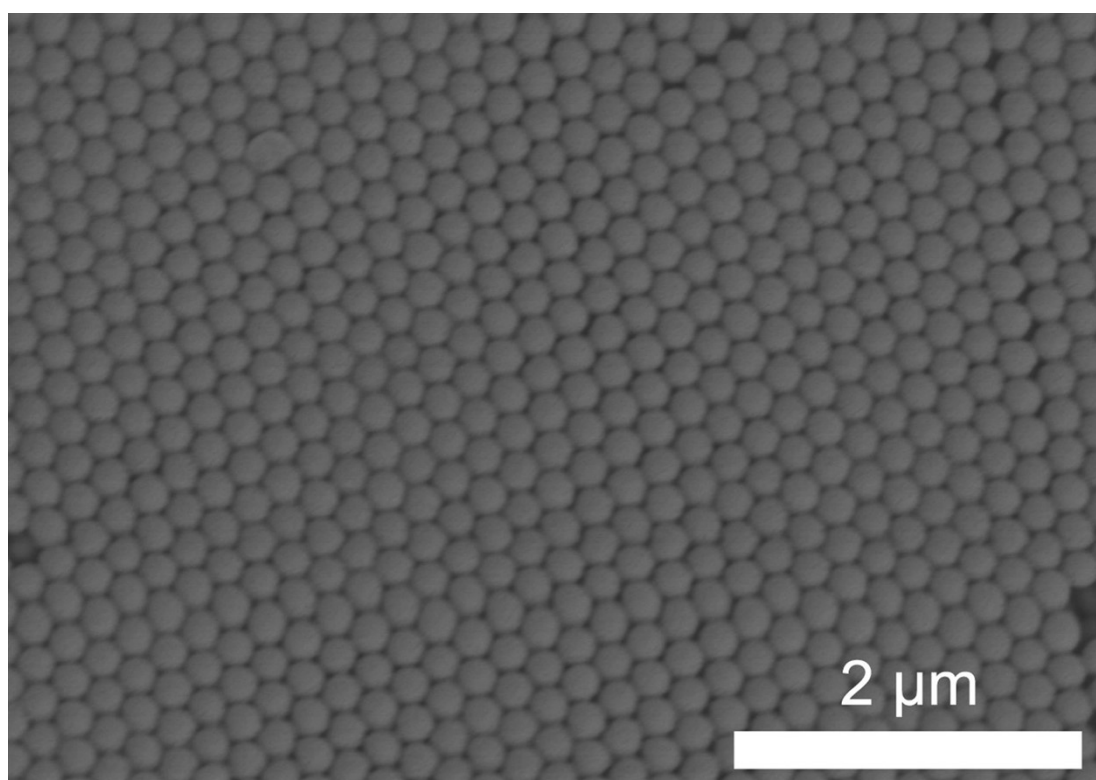

**Fig. S4** Top-view SEM images of PS PCs on cotton fabrics

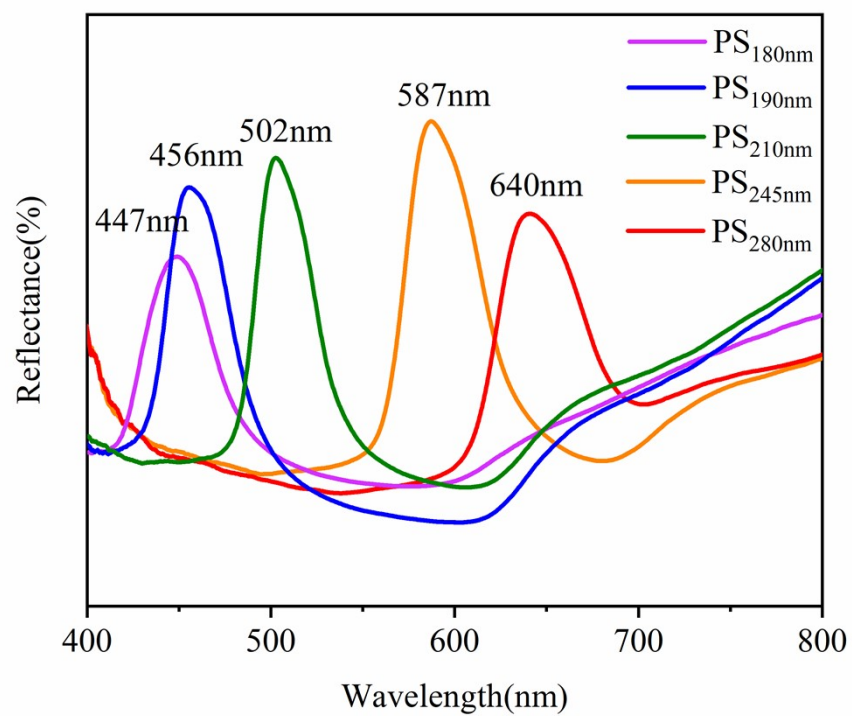

**Fig. S5** Reflection spectra of various structurally colored cotton fabric fabricated by PS NPs
